# Supplementary material for: Risk Factors for Intra-Abdominal Candidiasis in Intensive Care Units: Results from EUCANDICU Study
Source: PubMed Central journal article supplement — Infect Dis Ther. 2022 Feb 19;11(2):827–40. doi: 10.1007/s40121-021-00585-6 (PMC8960530; doi:10.1007/s40121-021-00585-6), 2022-02-19

# **Risk factors for Intra-Abdominal Candidiasis in Intensive Care units: results from EUCANDICU study**

Matteo Bassetti<sup>1,2#</sup>, Antonio Vena<sup>1,2#\*</sup>, Daniele R. Giacobbe<sup>1,2</sup>, Cecilia Trucchi<sup>3-4</sup>, Filippo Ansaldi<sup>3-4</sup>, Massimo Antonelli<sup>5,6</sup>, Vaclava Adamkova<sup>7,8</sup>, Cristiano Alicino<sup>9</sup>, Maria-Panagiota Almyroudi<sup>10</sup>, Enora Atchade<sup>11</sup>, Anna M. Azzini<sup>12</sup>, Pierluigi Brugnaro<sup>13</sup>, Novella Carannante<sup>14</sup>, Maddalena Peghin<sup>15</sup>, Marco Berruti<sup>1,2</sup>, Alessia Carnelutti<sup>15</sup>, Nadia Castaldo<sup>15</sup>, Silvia Corcione<sup>16</sup>, Andrea Cortegiani<sup>17</sup>, George Dimopoulos<sup>18</sup>, Simon Dubler<sup>19</sup>, José L. García-Garmendia<sup>20</sup>, Massimo Girardis<sup>21</sup>, Oliver A. Cornely<sup>22</sup>, Stefano Ianniruberto<sup>23</sup>, Bart Jan Kullberg<sup>24</sup>, Katrien Lagrou<sup>25</sup>, Clement Lebihan<sup>26</sup>, Roberto Luzzati<sup>27</sup>, Manu Malbrain<sup>28,29</sup>, Maria Merelli<sup>15</sup>, Ana J. Marques<sup>30</sup>, Ignacio Martin-Loeches<sup>31,32,33</sup>, Alessio Mesini<sup>2</sup>, José-Artur Paiva<sup>34</sup>, Santi Maurizio Raineri<sup>17,35</sup>, Riina Rautemaa-Richardson<sup>36</sup>, Jeroen Schouten<sup>24</sup>, Herbert Spapen<sup>37</sup>, Polychronis Tasioudis<sup>38</sup>, Jean-François Timsit<sup>39,40</sup>, Valentino Tisa<sup>2</sup>, Mario Tumbarello<sup>41</sup>, Charlotte H.S.B. van den Berg<sup>42</sup>, Benoit Veber<sup>43</sup>, Mario Venditti<sup>44</sup>, Guillaume Voiriot<sup>45</sup>, Joost Wauters<sup>46</sup>, Nathalie Zappella<sup>47</sup>, Philippe Montravers<sup>11,48</sup>

<sup>1</sup> Clinica Malattie Infettive, Ospedale Policlinico San Martino – IRCCS, Genoa, Italy

<sup>2</sup> Department of Health Sciences, University of Genoa, Genoa, Italy

<sup>3</sup> A.Li.Sa. Liguria Health Authority, Genoa, Italy

<sup>4</sup> Healthcare planning unit, Ospedale Policlinico San Martino – IRCCS, Genoa, Italy

<sup>5</sup> Department of Intensive Care Anesthesiology and Emergency Medicine, Fondazione Policlinico Universitario Agostino Gemelli IRCCS, Rome, Italy

<sup>6</sup> Istituto di Anestesiologia e Rianimazione, Università Cattolica del Sacro Cuore,

<sup>7</sup> Clinical Microbiology and ATB Centre, Institute of Medical Biochemistry and Laboratory Diagnostics, General University Hospital, Prague, Czech Republic

<sup>8</sup> Department of Medical Microbiology, Medical Faculty of Palackeho University, Olomouc, Czech Republic

<sup>9</sup> Medical Direction, Santa Corona Hospital, ASL 2 Regional Health System of Liguria, Pietra Ligure, Italy

<sup>10</sup> Attikon General University Hospital, Athens, Greece

<sup>11</sup> Département d'Anesthésie-Réanimation, CHU Bichat-Claude Bernard, HUPNVS, APHP, Paris, France

<sup>12</sup> Department of Diagnostics and Public Health, Infectious Disease Unit, University of Verona, Verona, Italy

<sup>13</sup> Ospedale Civile SS. Giovanni e Paolo, Venice, Italy

<sup>14</sup> First Division of Infectious Diseases, Cotugno Hospital, AORN dei Colli, Naples, Italy

<sup>15</sup> Infectious Diseases Clinic, Santa Maria della Misericordia University Hospital of Udine, ASUFC.

<sup>16</sup> Department of Medical Sciences, Infectious Diseases, University of Turin, Turin, Italy

<sup>17</sup> Department of Surgical, Oncological and Oral Science (Di.Chir.On.S.). Section of Anesthesia, Analgesia, Intensive Care and Emergency. Policlinico Paolo Giaccone. University of Palermo, Italy

<sup>18</sup> Department of Critical Care, University Hospital Attikon, Attikon Medical School, National and Kapodistrian University of Athens, Athens, Greece.

<sup>19</sup> Department of Anesthesiology and Intensive care medicine, Heidelberg University Hospital, Heidelberg, Germany

<sup>20</sup> Servicio de Cuidados Críticos y Urgencias, Hospital San Juan de Dios del Aljarafe, Bormujos, Sevilla, España

<sup>21</sup> Department of Anesthesia and Intensive Care, University Hospital of Modena, Modena, Italy

<sup>22</sup> Department I of Internal Medicine, University Hospital of Cologne and Cologne Excellence Cluster on Cellular Stress Responses in Aging-Associated Diseases (CECAD), Cologne, Germany

<sup>23</sup> Infectious Diseases Unit, Department of Medical and Surgical Science, S. Orsola-Malpighi Hospital, University of Bologna, Bologna, Italy

<sup>24</sup> Radboud umc Center for Infectious Diseases, Radboud University Medical Center, Nijmegen, The Netherlands

<sup>25</sup> Department of Laboratory Medicine and National Reference Centre for Mycosis, University Hospitals of Leuven, Leuven, Belgium and Department of Microbiology and Immunology and Transplantation, KU Leuven, Leuven, Belgium

<sup>26</sup> APHP; Medical and infectious diseases ICU (MI2), Bichat hospital, F75018 Paris, France

<sup>27</sup> Infectious Diseases Department, Azienda Sanitaria Universitaria Integrata di Trieste, Trieste, Italy

<sup>28</sup> Department of Intensive Care Medicine, University Hospital Brussels (UZB), 1090 Jette, Belgium

<sup>29</sup>. Faculty of Medicine and Pharmacy, Vrije Universiteit Brussel (VUB), 1090 Brussels, Belgium

<sup>30</sup> C.H. Vila Nova de Gaia/Espinho, Vila Nova de Gaia, Portugal

<sup>31</sup> Department of Intensive Care Medicine, Multidisciplinary Intensive Care Research Organization (MICRO), St. James's Hospital, Dublin, Ireland

<sup>32</sup> Centro de Investigación Biomedica En Red-Enfermedades Respiratorias, Instituto de Salud Carlos III, Madrid, Spain;

<sup>33</sup> Pneumology Department, Respiratory Institute, Hospital Clinic of Barcelona - Institut d'Investigacions Biomèdiques August Pi i Sunyer - University of Barcelona, Barcelona, Spain

<sup>34</sup> Department of Emergency and Intensive Care Medicine, Centro Hospitalar Universitário São João, Faculdade de Medicina da Universidade do Porto e Grupo de Infecção e Sépsis, Portugal

<sup>35</sup> Institute for Biomedical Research and Innovation (IRIB) - National research Council (CNR) - Palermo

<sup>36</sup> Division of Infection, Immunity and Respiratory Medicine, Faculty of Biology, Medicine and Health, University of Manchester AND Department of Infectious Diseases, Manchester University NHS Foundation Trust, Wythenshawe Hospital, UK.

<sup>37</sup> Universitair Ziekenhuis Brussel, VUB University, Brussels, Belgium

<sup>38</sup> G. Gennimatas General Hospital of Thessaloniki, Greece

<sup>39</sup> Université Paris Diderot/Hopital Bichat-Réanimation Medicale et Des Maladies Infectieuses, Paris, France

<sup>40</sup> UMR 1137-IAME Team 5-DeSCID: Decision Sciences in Infectious Diseases, Control and Care, Inserm/Univ Paris Diderot, Sorbonne Paris Cité, Paris, France

<sup>41</sup> Institute of Infectious Diseases, Fondazione Policlinico Universitario A. Gemelli IRCCS – Università Cattolica del Sacro Cuore, Rome, Italy

<sup>42</sup> Department of Intensive Care, University Medical Center Groningen, Groningen, the Netherlands

<sup>43</sup> Pole Anesthésie-Réanimation-SAMU, Rouen University Hospital, Rouen, France

<sup>44</sup> Department of Public Health and Infectious Diseases, Sapienza University of Rome, Rome, Italy

<sup>45</sup>Service de Réanimation et USC médico-chirurgicale, AP-HP, Hôpitaux Universitaires de l'Est Parisien, Pôle TVAR, Hôpital Tenon , Paris , France

<sup>46</sup> University Hospitals Leuven, Department of General Internal Medicine, Medical Intensive Care Unit

<sup>47</sup> Centre Hospitalier de Versailles, Versailles, France

<sup>48</sup> Université Paris Diderot/INSERM UMR 1152/Sorbonne Paris Cité, Paris France

#Equally contributed to this work

**Address correspondence and reprint requests to:** Dottor Antonio Vena Clinica Malattie Infettive; Ospedale Policlinico San Martino – IRCCS. L.go R. Benzi 10; 16132 – Genoa, Italy; Telephone: +390105554658; E-mail: anton.vena@gmail.com

**SUPPLEMENTARY MATERIAL**  
**Flow-chart patients included in the EUCANDICU study**

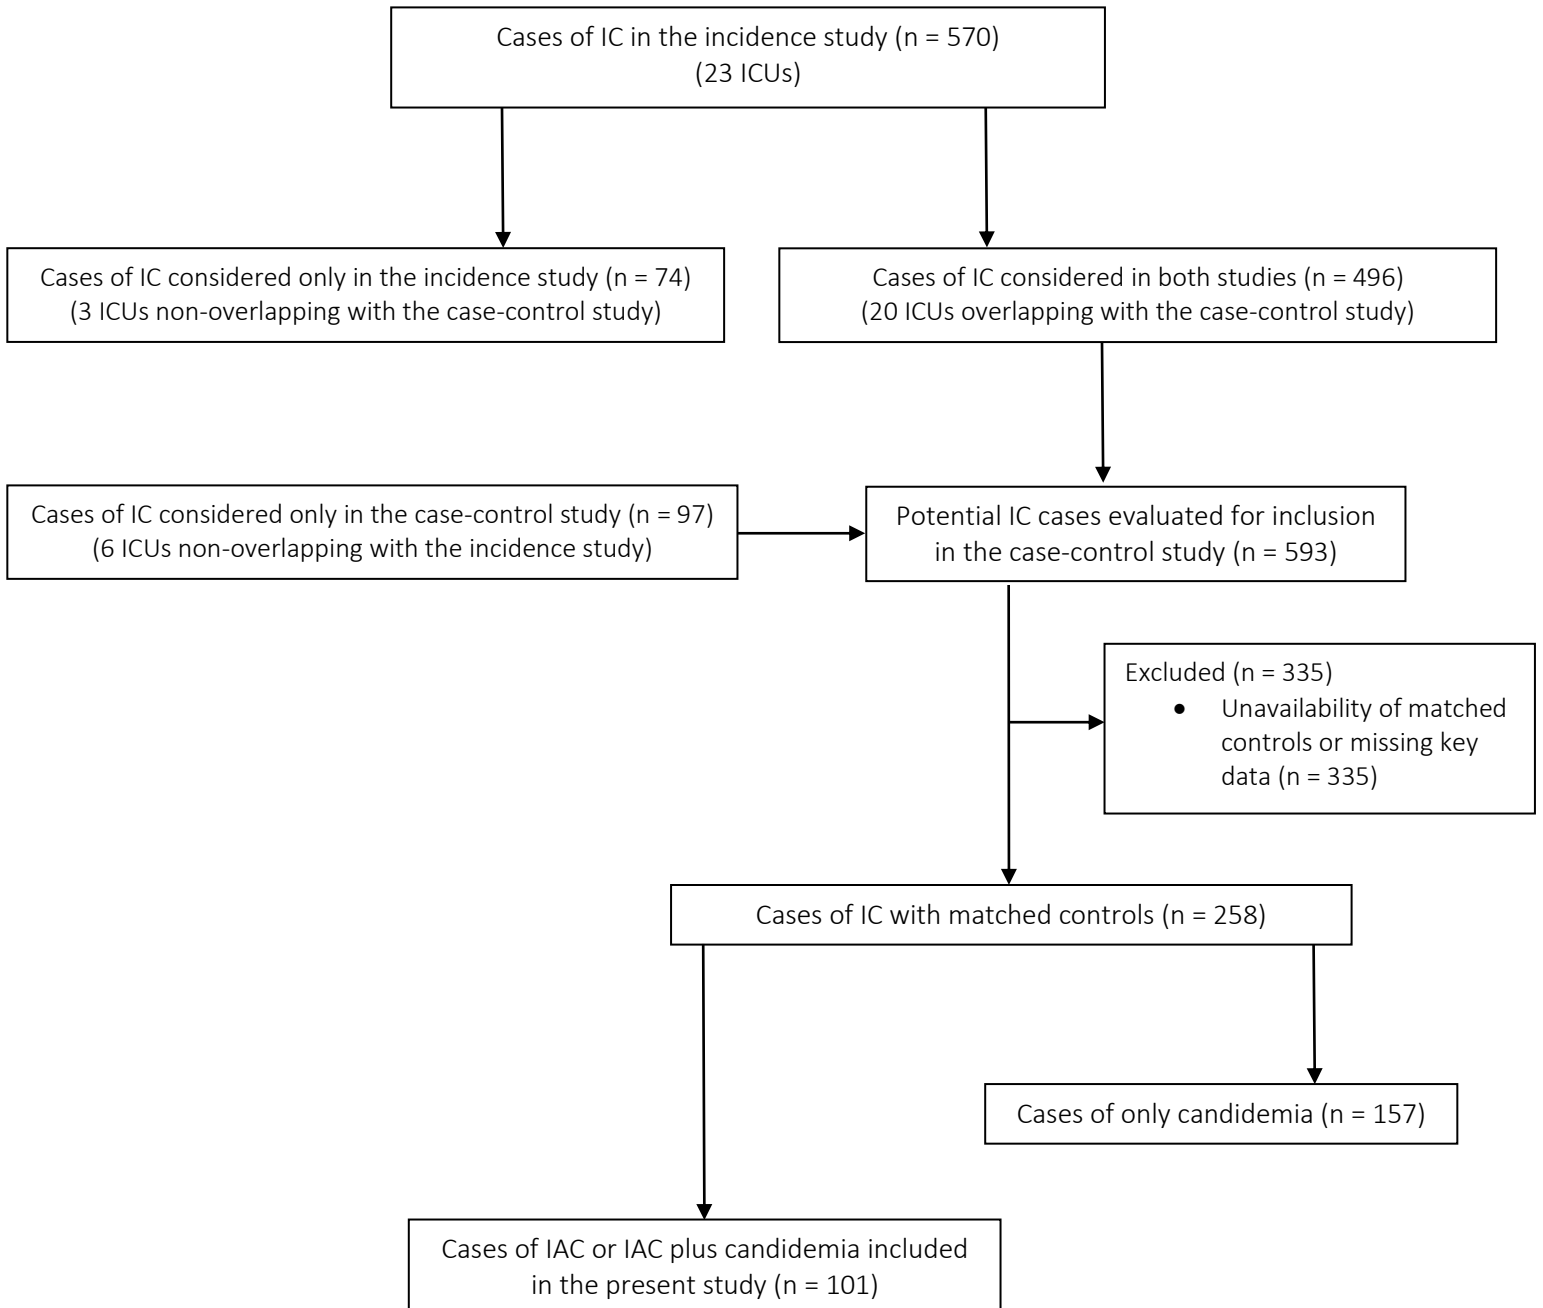

Supplement: 40121_2021_585_MOESM1_ESM.pdf [file 40121_2021_585_MOESM1_ESM.pdf]
